# Supplementary material
Source: ML conference proceedings conference paper supplement (https://openaccess.thecvf.com/content/ICCV2023/html/Karunratanakul_Guided_Motion_Diffusion_ICCV_2023_paper.html)
Supplement: Supplementary file 1 [file Karunratanakul_Guided_Motion_Diffusion_ICCV_2023_supplemental.zip]

Archive with 2 entries (2 files):
- 02015-supp.pdf
- supplementary_video.mp4
